# Supplementary material for: Ginkgo biloba Extract Preventively Intervenes in Citrobacter Rodentium-Induced Colitis in Mice
Source: MDPI journal article supplement (doi:10.3390/nu15082008), 2023-04-21
Supplement: s1 [file s1]

**Table S1.** GC-MS detection conditions.

| Chromatographic Conditions      |                                                                      |
|---------------------------------|----------------------------------------------------------------------|
| HP FFAP Capillary Column        | 30 m × 0.25 mm × 0.25 µm,<br>Agilent J&W Scientific, Folsom, CA, USA |
| Carrier Gas                     | high purity helium (purity ≥ 99.999%)                                |
| Flow Rate                       | 1.0 mL/min                                                           |
| Inlet Temperature               | 180 °C                                                               |
| Injection Volume                | 1 µL                                                                 |
| Split Ratio,                    | 10:1                                                                 |
| Solvent Delay                   | 2.5 min                                                              |
| Initial Temperature             | 80 °C                                                                |
| Increased Temperature 2         | 120 °C, 20 °C/min                                                    |
| Increased Temperature2          | 160 °C, 5 °C/min                                                     |
| Final Temperature               | 220 °C, 3 min                                                        |
| Mass spectrometry Conditions    |                                                                      |
| Electron Bombardment Ion Source | EI                                                                   |
| Ion Source Temperature          | 230 °C                                                               |
| Quadrupole Temperature          | 150 °C                                                               |
| Transmission Line Temperature   | 230 °C                                                               |
| Electron Energy                 | 70 eV                                                                |
| Scanning Mode                   | SIM                                                                  |

**Table S2.** Chemical components of GBE.

| No.                         | Name                                                                        | Formula        | Calc.<br>MW | RT<br>[min] | mzVaul<br>t Best<br>Match | Group<br>Area |
|-----------------------------|-----------------------------------------------------------------------------|----------------|-------------|-------------|---------------------------|---------------|
| Flavonol and its glycosides |                                                                             |                |             |             |                           |               |
| 1                           | Quercetin                                                                   | C15 H10 O7     | 302.0421    | 25.39<br>3  | 92.1                      | 3.45E+09      |
| 2                           | Quercetin-3 $\beta$ -D-glucoside                                            | C21 H20<br>O12 | 464.0952    | 25.19<br>0  | 97.5                      | 3.28E+09      |
| 3                           | Quercitrin                                                                  | C21 H20<br>O11 | 448.1002    | 26.16<br>4  | 91.4                      | 2.40E+09      |
| 4                           | Isoquercitrin                                                               | C21 H20<br>O12 | 464.0951    | 24.72<br>8  | 89.2                      | 7.37E+08      |
| 5                           | Rutin                                                                       | C27 H30<br>O16 | 610.1527    | 24.74<br>4  | 96.8                      | 9.15E+09      |
| 6                           | Kaempferol                                                                  | C15 H10 O6     | 286.0472    | 26.24<br>3  | 90.1                      | 4.75E+09      |
| 7                           | Kaempferol-3-O-rutinoside                                                   | C27 H30<br>O15 | 594.158     | 25.50<br>4  | 91.3                      | 6.30E+09      |
| 8                           | Kaempferol 3-glucorhamnoside                                                | C27 H30<br>O15 | 594.1581    | 26.22<br>7  | 91                        | 6.70E+09      |
| 9                           | Astragalin                                                                  | C21 H20<br>O11 | 448.1001    | 25.48<br>9  | 90.7                      | 7.86E+08      |
| 10                          | Kaempferol-7-O-glucoside                                                    | C21 H20<br>O11 | 448.1002    | 26.80<br>6  | 86.3                      | 1.35E+09      |
| 11                          | Afzelin                                                                     | C21 H20<br>O10 | 432.1052    | 27.23<br>6  | 87.5                      | 6.06E+08      |
| 12                          | Kaempferol-3-O- $\beta$ -glucopyranosyl-<br>7-O- $\alpha$ -rhamnopyranoside | C27 H30<br>O15 | 594.158     | 23.65       | 75.3                      | 1.56E+08      |
| 13                          | Kaempferol-7-O- $\beta$ -D-glucopyranosi<br>de                              | C21 H20<br>O11 | 448.1001    | 23.35<br>5  | 85.5                      | 3.30E+07      |
| 14                          | Leucoside                                                                   | C26 H28<br>O15 | 580.1426    | 25.31<br>5  | 76.4                      | 3.73E+07      |
| 15                          | Tiliroside                                                                  | C30 H26<br>O13 | 594.1374    | 24.53<br>8  | 72                        | 3.00E+07      |
| 16                          | Isorhamnetin                                                                | C16 H12 O7     | 316.0579    | 26.20<br>1  | 84.9                      | 4.04E+08      |
| 17                          | Isorhamnetin-3-O-nehesperidine                                              | C28 H32<br>O16 | 624.1683    | 24.38<br>0  | 87.7                      | 3.35E+08      |
| 18                          | Typhaneoside                                                                | C34 H42<br>O20 | 770.2261    | 24.39<br>6  | 91.3                      | 1.80E+09      |
| 19                          | Syringetin-3-O-glucoside                                                    | C23 H24<br>O13 | 508.1214    | 25.71<br>0  | 75.9                      | 7.77E+07      |
| 20                          | Myricetin                                                                   | C15 H10 O8     | 318.0373    | 27.14       | 92.7                      | 9.38E+08      |

|    |                                   |             |          |        |      |          |
|----|-----------------------------------|-------------|----------|--------|------|----------|
|    |                                   |             |          | 0      |      |          |
| 21 | Grosvenorine                      | C33 H40 O19 | 740.2157 | 24.332 | 85.7 |          |
|    | Flavone and its glycosides        |             |          |        |      |          |
| 22 | Diosmetin                         | C16 H12 O6  | 300.063  | 31.641 | 85.8 | 1.42E+08 |
| 23 | Diosmetin-7-O-β-D-glucopyranoside | C22 H22 O11 | 462.1159 | 26.555 | 77.3 | 7.83E+08 |
| 24 | Apigenin-7-O-β-D-glucoside        | C21 H20 O10 | 432.105  | 26.305 | 90.9 | 3.01E+09 |
| 25 | Apigenin                          | C15 H10 O5  | 270.0525 | 31.196 | 94.7 | 5.45E+08 |
| 26 | Vicenin II                        | C27 H30 O15 | 594.1578 | 23.318 | 81.4 | 5.20E+07 |
| 27 | Genkwanin                         | C16 H12 O5  | 284.0682 | 36.328 | 87.2 | 2.04E+08 |
| 28 | Sakuranetin                       | C16 H14 O5  | 286.0837 | 35.978 | 81.5 | 1.46E+08 |
| 29 | Mearnsitrin                       | C22 H22 O12 | 478.1106 | 24.892 | 71.7 | 1.20E+08 |
| 30 | Chrysin                           | C15 H10 O4  | 254.0576 | 35.839 | 54.6 | 4.15E+06 |
| 31 | Baicalin                          | C21 H18 O11 | 446.0847 | 27.568 | 79.1 | 2.44E+07 |
|    | Flavanone and its glycosides      |             |          |        |      |          |
| 32 | Naringenin                        | C15 H12 O5  | 272.068  | 26.367 | 91.2 | 3.00E+08 |
| 33 | 4',7-Dihydroxyflavanone           | C15 H12 O4  | 256.073  | 26.933 | 59.5 | 8.42E+07 |
| 34 | Liquiritin                        | C21 H22 O9  | 418.1256 | 27.757 | 70.9 | 3.21E+08 |
| 35 | (-)-Fustin                        | C15 H12 O6  | 288.063  | 23.386 | 74.8 | 1.93E+08 |
| 36 | Pinocembrin                       | C15 H12 O4  | 256.073  | 27.77  | 80   | 8.96E+07 |
|    | flavan-3-ols                      |             |          |        |      |          |
| 37 | Epigallocatechin                  | C15 H14 O7  | 306.0737 | 22.516 | 95.2 | 5.77E+08 |
| 38 | Catechin                          | C15 H14 O6  | 290.0787 | 22.963 | 94.6 | 5.21E+08 |
| 39 | (+)-Catechin hydrate              | C15 H14 O6  | 290.0783 | 27.789 | 77.9 | 8.51E+07 |
|    | Biflavonoids                      |             |          |        |      |          |
| 40 | Ginkgetin                         | C32 H22 O10 | 566.121  | 39.272 | 91.2 | 2.81E+07 |

|                     |                             |             |          |        |      |          |
|---------------------|-----------------------------|-------------|----------|--------|------|----------|
| 41                  | Amentoflavone               | C30 H18 O10 | 538.0896 | 33.187 | 86.2 | 2.71E+08 |
| 42                  | Bilobetin                   | C31 H20 O10 | 552.1051 | 35.228 | 85.3 | 5.63E+08 |
| 43                  | Sciadopitysin               | C33 H24 O10 | 580.1366 | 43.554 | 81.1 | 3.65E+07 |
| Terpenoids          |                             |             |          |        |      |          |
| 44                  | Ginkgolide A                | C20 H24 O9  | 408.1415 | 29.126 | 84.4 | 1.50E+10 |
| 45                  | Ginkgolide B                | C20 H24 O10 | 424.1365 | 29.142 | 92.9 | 1.00E+10 |
| 46                  | Ginkgolide C                | C20 H24 O11 | 440.1315 | 25.976 | 89.5 | 3.42E+09 |
| 47                  | Ginkgolide J                | C20 H24 O10 | 424.1365 | 25.837 | 88.2 | 7.40E+08 |
| 48                  | Ginkgolide K                | C20 H22 O9  | 406.126  | 33.187 | 92.2 | 3.32E+08 |
| 49                  | Bilobalide                  | C15 H18 O8  | 326.0996 | 26.336 | 86.5 | 1.12E+09 |
| Alkylphenolic acids |                             |             |          |        |      |          |
| 50                  | Ginkgolic Acid C15:1        | C22 H34 O3  | 346.2505 | 50.637 | 86.6 | 7.15E+06 |
| 51                  | Ginkgolic acid C17:1        | C24 H38 O3  | 374.2819 | 52.660 | 79.5 | 3.10E+06 |
| Carboxylic acids    |                             |             |          |        |      |          |
| 52                  | Vanillic acid               | C8 H8 O4    | 168.0421 | 21.672 | 80.4 | 7.19E+06 |
| 53                  | p-Coumaric acid             | C9 H8 O3    | 164.0471 | 28.794 | 53.4 | 1.97E+07 |
| 54                  | Gallic acid                 | C7 H6 O5    | 170.0214 | 8.560  | 88.4 | 5.24E+07 |
| 55                  | 3,4-Dimethylbenzoic acid    | C9 H10 O2   | 150.0679 | 24.908 | 84.4 | 6.80E+07 |
| 56                  | 2,3-Dihydroxybenzoic acid   | C7 H6 O4    | 154.0265 | 18.996 | 98.7 | 5.25E+08 |
| 57                  | 3-Coumaric acid             | C9 H8 O3    | 164.0472 | 25.033 | 95.9 | 81054435 |
| 58                  | 4-Coumaric acid             | C9 H8 O3    | 164.0471 | 27.757 | 86.7 | 2.89E+08 |
| Lignans             |                             |             |          |        |      |          |
| 59                  | Lariciresinol 4-O-glucoside | C26 H34 O11 | 522.2096 | 24.939 | 85.5 | 2.75E+09 |
| 60                  | Pinoresinol diglucoside     | C32 H42 O16 | 682.2471 | 23.564 | 90.7 | 5.95E+08 |
| 61                  | Dehydrodiisoeugenol         | C20 H22 O4  | 326.1512 | 24.38  | 80.6 | 2.27E+08 |

|    |              |            |         |       |      |          |
|----|--------------|------------|---------|-------|------|----------|
| 62 | Cyclooolivil | C20 H24 O7 | 376.152 | 0     | 85.7 | 8.22E+07 |
|    |              |            |         | 24.20 |      |          |
|    |              |            |         | 5     |      |          |

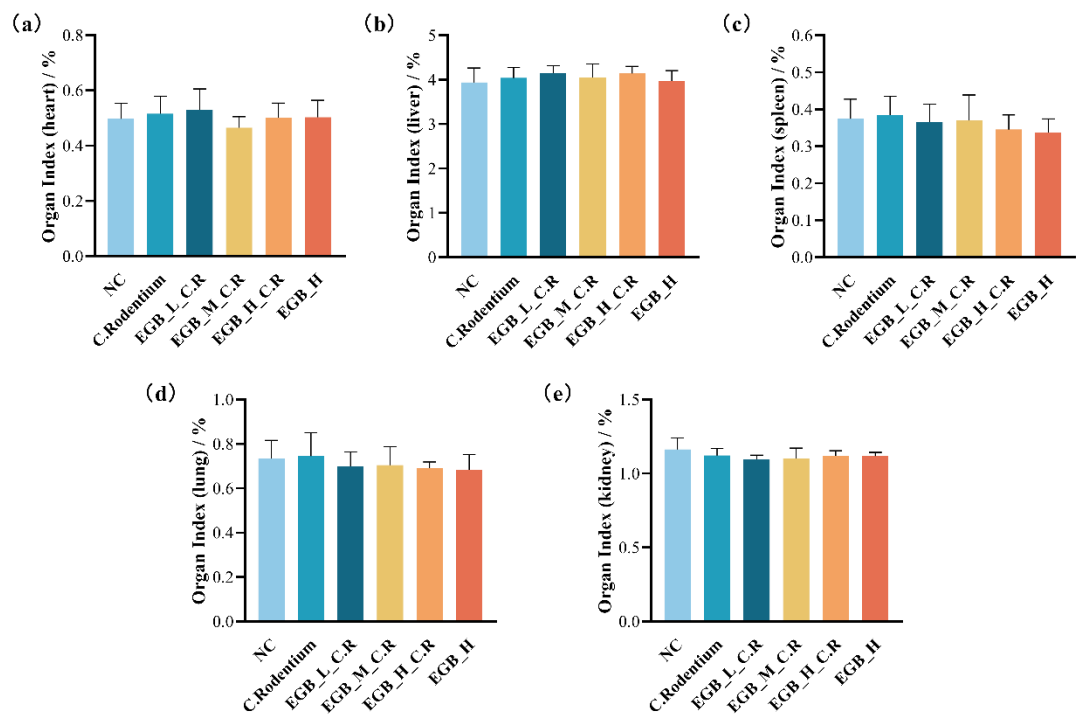

**Figure S1.** The organ coefficients of heart (a), liver (b), spleen (c), lung (d), and kidney (e) in all

groups.

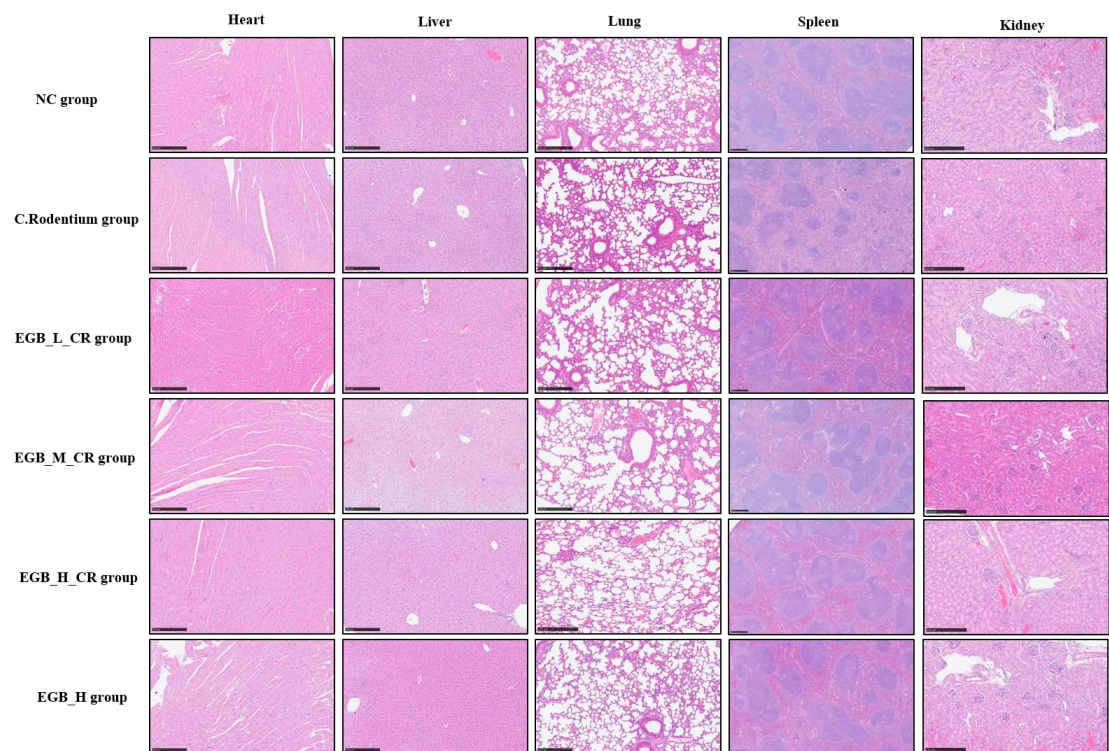

**Figure S2.** The histological evaluation of heart, liver, spleen, lung and kidney in all groups. All the scale bars are 250  $\mu\text{m}$ .
